# Supplementary material for: Detailed Physiologic Characterization Reveals Diverse Mechanisms for Novel Genetic Loci Regulating Glucose and Insulin Metabolism in Humans
Source: Oxford University Press journal article supplement (doi:10.2337/db09-1568), 2010-02-25
Supplement: db091568-sup-online_appendix_supplementary_table_5.xls [file db091568-sup-online_appendix_supplementary_table_5.xls]

## Sheet: Supplementary Table 5
MarkerName	Nearest gene	Glucose raising allele	Other allele	Effect allele frequency (from insulinogenic index meta-analysis)	Insulinogenic index (upper row: age-sex-adjusted / lower row: age-sex-BMI-adjusted)				Proinsulin (upper row: age-sex-adjusted / lower row: age-sex-BMI-adjusted)				M+Si+IST (upper row: age-sex-adjusted / lower row: age-sex-BMI-adjusted)				Belfiore (upper row: age-sex-adjusted / lower row: age-sex-BMI-adjusted)				Matsuda (upper row: age-sex-adjusted / lower row: age-sex-BMI-adjusted)				Gutt (upper row: age-sex-adjusted / lower row: age-sex-BMI-adjusted)				Stumvoll (upper row: age-sex-adjusted / lower row: age-sex-BMI-adjusted)
					Beta	SE	P-value*	N	Beta	SE	P-value*	N	Beta	SE	P-value*	N	Beta	SE	P-value*	N	Beta	SE	P-value*	N	Beta	SE	P-value*	N	Beta	SE	P-value*	N
rs560887	G6PC2	C	T	0.692	0.0518	0.0128	4.975e-05	6285	-0.0017	0.0073	0.8143	11819	-0.045	0.0248	0.06896	2928	-0.009	0.0045	0.0443	6593	-0.0111	0.0098	0.2551	6375	-0.0052	0.0059	0.3752	6706	0.0044	0.0068	0.5175	6521
					0.0523	0.0126	3.238e-05	6262	0.0005	0.0071	0.9408	11800	-0.0523	0.0219	0.01673	2928	-0.0085	0.0042	0.04387	6567	-0.0123	0.0089	0.1679	6348	-0.0053	0.0055	0.3347	6700	0.0055	0.0058	0.3368	6521
rs10830963	MTNR1B	G	C	0.3098	-0.0807	0.009	2.256e-19	14930	0.0074	0.0054	0.1729	17035	0.0461	0.0242	0.0571	3032	0.0021	0.0034	0.5469	15312	-0.0091	0.0071	0.1987	15089	-0.0118	0.0043	0.00637	15506	-0.0079	0.0045	0.0767	15155
					-0.0788	0.0089	7.876e-19	14905	0.0077	0.0056	0.1714	16426	0.0391	0.0214	0.06733	3032	0.001	0.0031	0.7454	15286	-0.0132	0.0061	0.02986	15062	-0.0133	0.004	0.0008823	15500	-0.0127	0.0035	0.0002931	15155
rs4607517	GCK	A	G	0.1293	-0.0479	0.013	0.0002224	14552	0.0026	0.0072	0.7208	16588	0.0015	0.0332	0.9633	2949	0.0029	0.0048	0.5392	14935	-0.0053	0.0099	0.5884	14710	-0.0228	0.0058	8.128e-05	15104	-0.0079	0.0065	0.2239	14782
					-0.0512	0.0127	5.819e-05	14526	0.0049	0.0073	0.5021	15975	-0.0188	0.0293	0.5228	2949	0.0026	0.0044	0.557	14906	-0.0043	0.0087	0.6226	14680	-0.0229	0.0055	2.904e-05	15097	-0.0077	0.0051	0.1295	14782
rs2191349	DGKB	T	G	0.4997	-0.0228	0.0083	0.006013	14311	0.0057	0.0049	0.2496	16364	0.0046	0.0288	0.8744	2360	0.0038	0.0032	0.2281	14691	0.0139	0.0064	0.03072	14471	0.0021	0.0041	0.6097	14851	0.005	0.0041	0.2243	14540
					-0.0199	0.0082	0.01586	14285	0.0035	0.0051	0.4955	15752	-0.0146	0.0256	0.5686	2360	0.0013	0.0029	0.6465	14662	0.0075	0.0057	0.1884	14441	-0.0005	0.0038	0.8983	14844	-0.0012	0.0033	0.7135	14540
rs780094	GCKR	C	T	0.6129	0.0146	0.0094	0.1196	11447	0.003	0.0054	0.5723	15663	-0.0344	0.0234	0.1425	3037	-0.0106	0.0036	0.003328	11792	-0.0315	0.0075	2.891e-05	11571	0	0.0045	0.9929	11935	-0.0167	0.0051	0.001081	11636
					0.0124	0.0093	0.181	11422	0.0095	0.0053	0.07204	15643	-0.01	0.0207	0.6305	3037	-0.0088	0.0033	0.007484	11766	-0.0287	0.0064	8.402e-06	11544	0.0021	0.0042	0.6179	11929	-0.014	0.0042	0.0009535	11636
rs11708067	ADCY5	A	G	0.8123	-0.0137	0.0107	0.2017	14455	0.0157	0.0063	0.01263	16547	-0.0095	0.0273	0.7282	3039	-0.0031	0.004	0.4369	14842	-0.0009	0.0082	0.9127	14614	-0.0159	0.0049	0.001214	15013	0.0051	0.0054	0.3416	14699
					-0.0142	0.0106	0.1836	14430	0.0169	0.0065	0.008981	15939	-0.037	0.0242	0.1253	3039	-0.0035	0.0037	0.3361	14816	-0.0024	0.0074	0.7415	14587	-0.0163	0.0046	0.0004042	15007	0.0031	0.0042	0.4669	14699
rs7944584	MADD	A	T	0.7716	0.0072	0.01	0.4722	14464	0.1049	0.0059	2.069e-71	16497	-0.0241	0.0275	0.3814	2901	-0.0085	0.0038	0.0236	14839	-0.0202	0.0078	0.009708	14618	-0.0076	0.0048	0.1145	15003	-0.0105	0.005	0.03348	14691
					0.0041	0.01	0.6818	14438	0.104	0.0059	8.525e-70	15885	-0.0154	0.0244	0.5278	2901	-0.006	0.0034	0.07639	14811	-0.0126	0.0069	0.06612	14589	-0.0053	0.0045	0.2356	14997	-0.0044	0.004	0.2739	14691
rs10885122	ADRA2A	G	T	0.8674	-0.018	0.0125	0.1514	14468	-0.0165	0.0076	0.0293	16508	-0.005	0.033	0.8797	2911	-0.0011	0.0047	0.8105	14847	-0.0077	0.0098	0.4327	14625	-0.0051	0.006	0.4019	15016	-0.0095	0.0062	0.1261	14698
					-0.0207	0.0122	0.09066	14442	-0.0178	0.0077	0.02078	15894	0.006	0.0293	0.8367	2911	0.001	0.0044	0.811	14818	-0.0025	0.0085	0.7653	14595	-0.0011	0.0057	0.8405	15009	-0.0048	0.005	0.3401	14698
rs11605924	CRY2	A	C	0.4985	-0.0138	0.0083	0.09779	14153	-0.0053	0.0049	0.2757	16314	-0.0131	0.0221	0.5526	2922	-0.0027	0.0031	0.381	14534	-0.0079	0.0065	0.2302	14310	-0.0098	0.004	0.01537	14700	-0.0076	0.0041	0.0669	14384
					-0.0162	0.0082	0.04984	14127	-0.0081	0.005	0.1048	15701	-0.0029	0.0197	0.8825	2922	-0.0008	0.0029	0.7706	14505	-0.0027	0.0057	0.6309	14280	-0.0086	0.0038	0.02241	14693	-0.0043	0.0033	0.1841	14384
rs174550	FADS1	T	C	0.6211	-0.0279	0.0086	0.001252	14434	-0.0005	0.0051	0.9284	16482	0.0106	0.0234	0.6519	2901	0.0048	0.0033	0.1465	14815	0.005	0.0067	0.4566	14595	-0.0013	0.0042	0.7661	14985	0.0078	0.0043	0.06946	14668
					-0.0265	0.0086	0.002008	14408	0.0007	0.0052	0.8906	15869	0.0082	0.0208	0.6936	2901	0.0031	0.003	0.3066	14786	-0.0012	0.0059	0.835	14565	-0.0048	0.0039	0.2243	14978	0.0051	0.0034	0.1303	14668
rs340874	PROX1	C	T	0.4735	-0.0203	0.0083	0.01503	14395	0.0069	0.0051	0.1765	16478	0.0062	0.0227	0.7843	2915	0.0013	0.0032	0.68	14766	-0.0002	0.0064	0.9768	14547	-0.0031	0.0041	0.4396	14934	-0.0042	0.0042	0.3092	14615
					-0.021	0.0083	0.01125	14369	0.0058	0.0053	0.2716	15867	-0.0121	0.02	0.543	2915	0.0019	0.0029	0.5205	14737	0.0021	0.0057	0.7182	14517	-0.0016	0.0038	0.6693	14927	-0.0014	0.0033	0.6801	14615
rs11920090	SLC2A2	T	A	0.8681	0.028	0.0123	0.02213	14486	-0.0112	0.0073	0.1268	16512	-0.0206	0.0334	0.5382	2910	-0.0031	0.0046	0.5024	14863	-0.0007	0.0096	0.9377	14641	-0.0095	0.006	0.1094	15033	0.0009	0.0061	0.883	14716
					0.0281	0.0122	0.02077	14461	-0.0144	0.0076	0.05661	15900	-0.0452	0.0296	0.1264	2910	-0.0054	0.0043	0.2081	14835	-0.0063	0.0085	0.4566	14612	-0.0112	0.0056	0.04533	15026	-0.0015	0.0048	0.7535	14716
rs7034200	GLIS3	A	C	0.5185	0.0008	0.0105	0.9413	8512	0.0177	0.0063	0.004983	11810	0.0027	0.0284	0.9247	2370	-0.0043	0.0037	0.2386	8844	0.0006	0.0079	0.9399	8629	-0.0036	0.005	0.4777	8992	-0.0015	0.0048	0.7514	8804
					0.0004	0.0103	0.9657	8495	0.0167	0.0061	0.006583	11203	0.0114	0.0252	0.6506	2370	-0.0042	0.0034	0.2235	8824	0.0001	0.0072	0.9842	8608	-0.0039	0.0047	0.411	8988	-0.0004	0.0038	0.9173	8804
rs11071657	FAM148B	A	G	0.6486	-0.0187	0.01	0.06283	10613	0.0172	0.0059	0.003658	14819	0.0163	0.0281	0.5616	1807	0.0017	0.0043	0.698	10697	0.0026	0.0081	0.7442	10571	-0.0001	0.0049	0.9883	10827	-0.0033	0.0058	0.5642	10506
					-0.017	0.01	0.08846	10588	0.0208	0.0061	0.0006022	14799	0.0211	0.0241	0.3822	1807	-0.0003	0.0039	0.9325	10671	-0.0016	0.0072	0.8211	10544	-0.0004	0.0048	0.9258	10821	-0.0054	0.0048	0.2558	10506
rs13266634	SLC30A8	C	T	0.6371	-0.0352	0.0109	0.001239	8985	0.0313	0.0067	2.742e-06	11156	-0.0403	0.0274	0.1415	2123	0.0072	0.0038	0.05525	9306	0.013	0.0083	0.1167	9207	-0.003	0.0057	0.5965	9370	0.0047	0.0049	0.3361	9291
					-0.033	0.0106	0.001793	8980	0.0336	0.0072	2.603e-06	10555	-0.0391	0.0245	0.1105	2123	0.0042	0.0035	0.2244	9301	0.0054	0.0073	0.4571	9202	-0.0064	0.0056	0.2487	9369	-0.0024	0.0038	0.5251	9291
rs7903146	TCF7L2	T	C	0.2205	-0.0566	0.0109	2.015e-07	12238	0.0454	0.0066	4.077e-12	13150	-0.0102	0.0261	0.6958	2981	0.0111	0.004	0.00531	12616	0.0223	0.0084	0.008175	12521	-0.0052	0.0057	0.3588	12682	0.0105	0.0052	0.04145	12528
					-0.0524	0.0108	1.261e-06	12217	0.049	0.0066	1.41e-13	12544	-0.0108	0.0231	0.6414	2981	0.007	0.0037	0.05847	12594	0.0096	0.0074	0.1992	12498	-0.0114	0.0053	0.03176	12676	0.0026	0.0042	0.5402	12528
rs35767	IGF1	G	A	0.8141	-0.0061	0.0108	0.5715	14450	0.0002	0.0067	0.9767	15616	-0.0202	0.0297	0.4967	2908	-0.0095	0.0041	0.02003	14829	-0.0216	0.0084	0.01033	14608	-0.0161	0.0052	0.002066	14997	0.0016	0.0054	0.7702	14675
					-0.0039	0.0107	0.7176	14424	0.0142	0.0069	0.03823	15009	-0.0171	0.0262	0.5139	2908	-0.0114	0.0037	0.002254	14800	-0.0279	0.0073	0.0001372	14578	-0.0183	0.005	0.0002847	14990	-0.0021	0.0043	0.6185	14675
rs10423928	GIPR	A	T	0.2292	-0.0791	0.0108	2.085e-13	13574	0.0307	0.0062	6.232e-07	15699	0.0328	0.0317	0.3011	1849	0.0253	0.0044	1.002e-08	13699	0.0286	0.0085	0.0007725	13582	-0.0099	0.0051	0.05339	13854	0.0164	0.0055	0.002874	13509
					-0.0743	0.0107	4.494e-12	13550	0.0346	0.0063	3.317e-08	15086	0.0286	0.0271	0.2903	1849	0.0198	0.004	9.538e-07	13673	0.0162	0.0073	0.02778	13556	-0.0152	0.005	0.002189	13848	0.0078	0.0043	0.06862	13509
rs17271305	VPS13C	G	A	0.4538	0.0189	0.0125	0.1299	5125	-0.0179	0.0074	0.01578	8365	-0.0215	0.0393	0.584	1253	-0.0011	0.0047	0.8138	5200	-0.0034	0.0097	0.7247	5208	-0.0012	0.0078	0.8778	5230	0.0041	0.0055	0.4597	5192
					0.0179	0.0123	0.1455	5115	-0.0175	0.0072	0.01506	7789	-0.0315	0.0334	0.3469	1253	-0.0008	0.0045	0.864	5188	-0.0035	0.0089	0.693	5196	-0.0021	0.0074	0.7744	5228	0.0003	0.0044	0.9495	5192
BMI (per tertile increment, additive model, age-adjusted from ULSAM)					0.156664	0.0292179	1.04e-07		0.257466	0.0209423	2.62e-32		-0.580757	0.0336881	5.03e-58		-0.148197	0.011284	2.86e-36		-0.289634	0.0188839	1.72e-47		-0.143883	0.0124422	5.33e-29		-0.270386	0.0174886	4.06e-48
* Significance of the tests of association under an additive genetic model (P-value) for each trait is reported using the following color coding: P≥0.05 - black text on white background; P<0.05 - dark blue text on blue background; P<0.005 - ruby text on red background; P<0.0005 - brown text on yellow background.
